# Supplementary material
Source: Springer Nature journal article supplement (https://www.springermedizin.de/resource/supplementary/12882_2005_63_MOESM5_ESM.pdf/9454912)

**-EDTA**

**+EDTA**

**none**

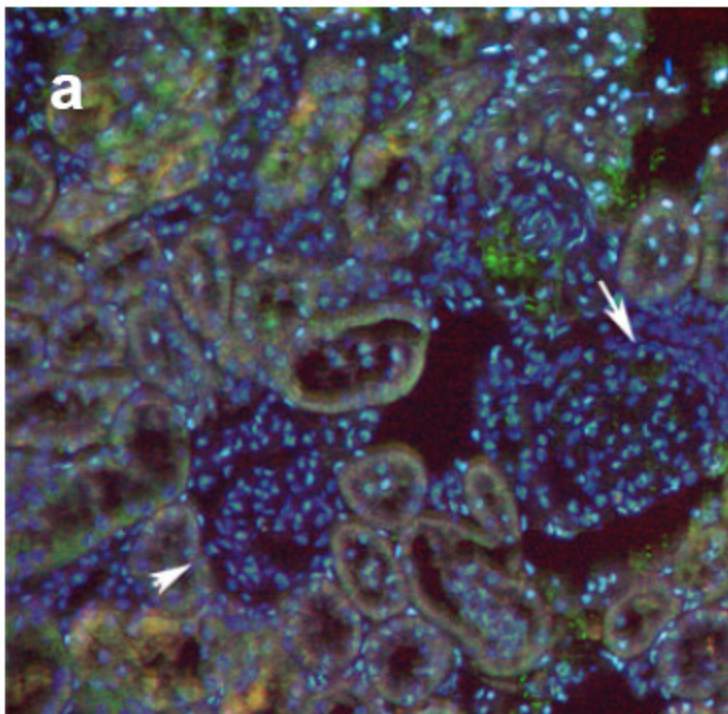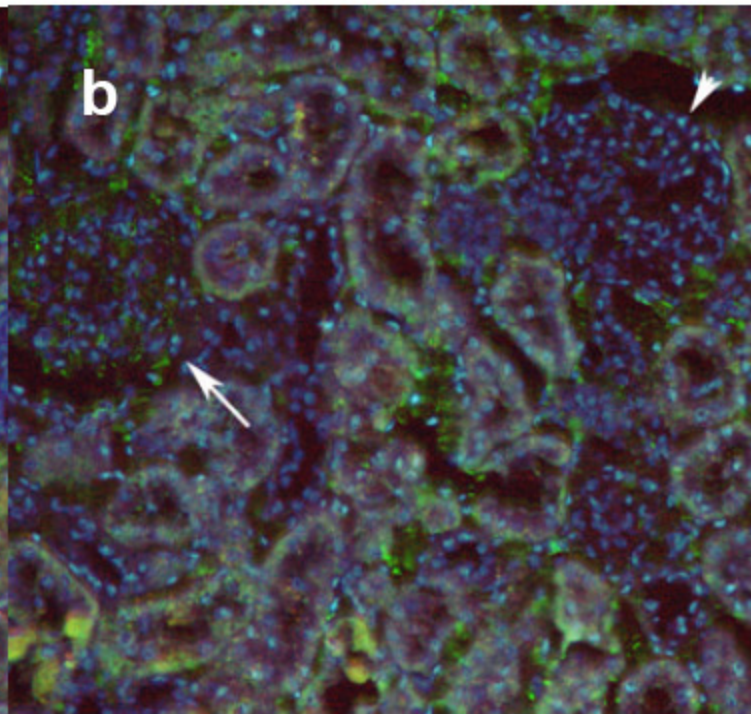

**Isc**

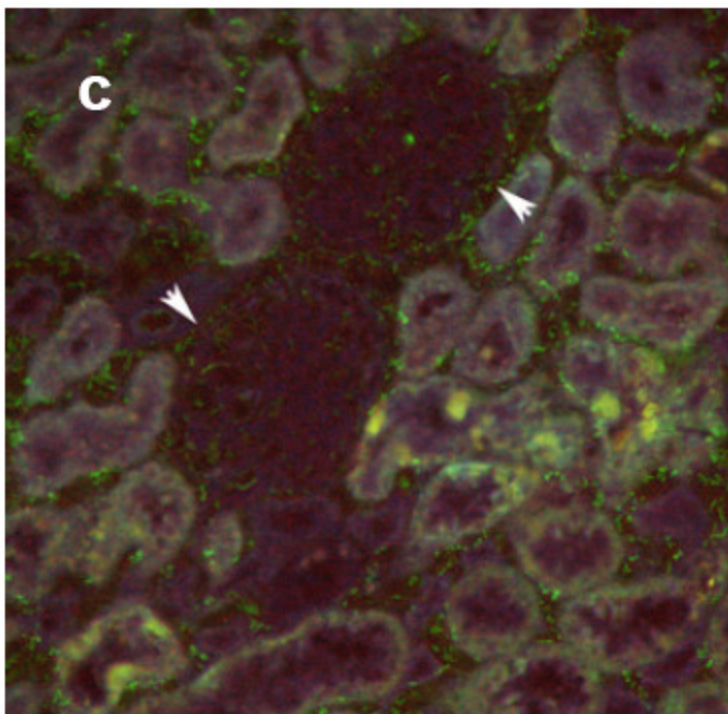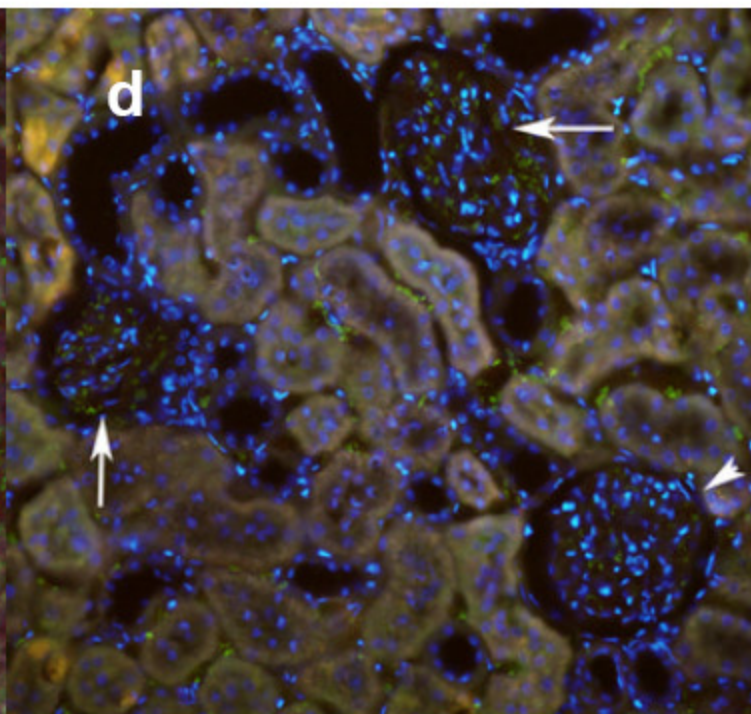

**Isc/R**

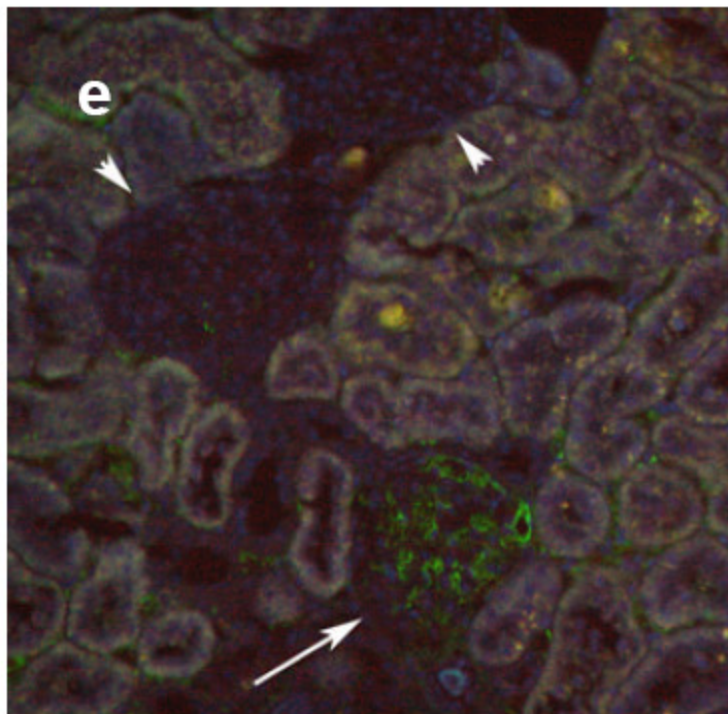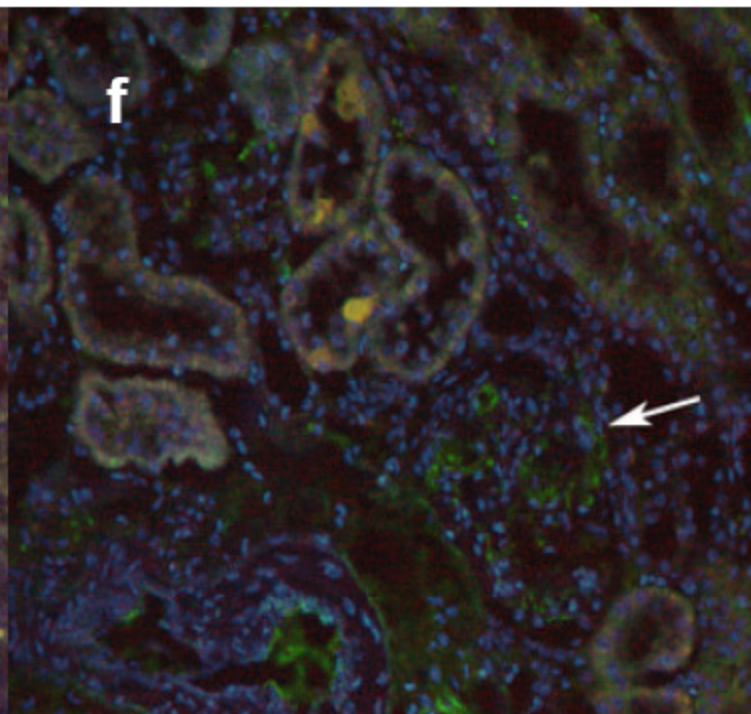

Supplement: MOESM5 [file 9454912]
